# Supplementary material
Source: PubMed Central journal article supplement (PMC6542686)
Supplement: EMS83021-supplement-Supplementary_File.pdf [file EMS83021-supplement-Supplementary_File.pdf]

### SNP genotyping protocol and TaqMan® SNP genotyping assays

Genotyping was performed by real-time PCR based allelic discrimination assay on a DNA Engine Chromo4 system (Bio-Rad Laboratories, Inc., Hercules, CA, USA). The PCR protocol involved an initial denaturation step at 95°C for 15 min, followed by 50 cycles of amplification at 95°C for 15 s and final annealing at 60°C for 1 min. TaqMan® Genotyping Master Mix and assays for the following SNPs were obtained from Life Technologies Ltd (Paisley, Renfrewshire, UK).

| Gene and SNP               | Reference SNP ID | Product ID (Life Technologies) |
|----------------------------|------------------|--------------------------------|
| <i>CYP2B6</i> 516G>T       | rs3745274        | C_7817765_60                   |
| <i>CYP2B6</i> 983T>C       | rs28399499       | C_60732328_20                  |
| <i>CYP2B6</i> c.485-18C>T  | rs4803419        | C_7817764_10                   |
| <i>NR1I3</i> c.540C>T      | rs2307424        | C_25746794_20                  |
| <i>NR1I3</i> c.152-1089T>C | rs3003596        | C_16194070_10                  |
| <i>ABCB1</i> 4046A>G       | rs1045642        | C_7586657_20                   |
| <i>ABCB1</i> 4036A>G       | rs3842           | C_11711730_20                  |
| <i>ABCB1</i> 1236C>T       | rs1128503        | C_7586662_10                   |
| <i>CYP2A6</i> 48T>G        | rs28399433       | C_30634332_10                  |
| <i>ABCB5</i> c.2908G>A     | rs6461515        | C_25621077_20                  |
| <i>ABCG2</i> c.1728-46G>A  | rs2231164        | C_15922479_10                  |
| <i>ABCG2</i> 78551A>G      | rs2622604        | C_9510352_10                   |

Opticon Monitor® version 3.1 (Bio-Rad Laboratories, Inc., Hercules, CA, USA) was used to obtain allelic discrimination plots and make allele calls.
